# Supplementary material for: 3D printing of layered vanadium disulfide for water-in-salt electrolyte zinc-ion batteries
Source: Royal Society of Chemistry journal article supplement (doi:10.1039/d3nh00576c), 2024-01-01
Supplement: d3nh00576c1.pdf [file d3nh00576c1.pdf]

## Supporting Information

### **3D printing of layered vanadium disulfide for water-in-salt electrolyte- zinc-ion batteries**

*Stefano Tagliaferri,<sup>a</sup> Goli Nagaraju,<sup>a</sup> Maria Sokolikova,<sup>a</sup> Rachael Quintin-Baxendale,<sup>a</sup> Cecilia Mattevi\*<sup>a</sup>*

<sup>a</sup> Department of Materials, Imperial College London, London SW7 2AZ, United Kingdom

\*Corresponding author: [c.mattevi@imperial.ac.uk](mailto:c.mattevi@imperial.ac.uk)

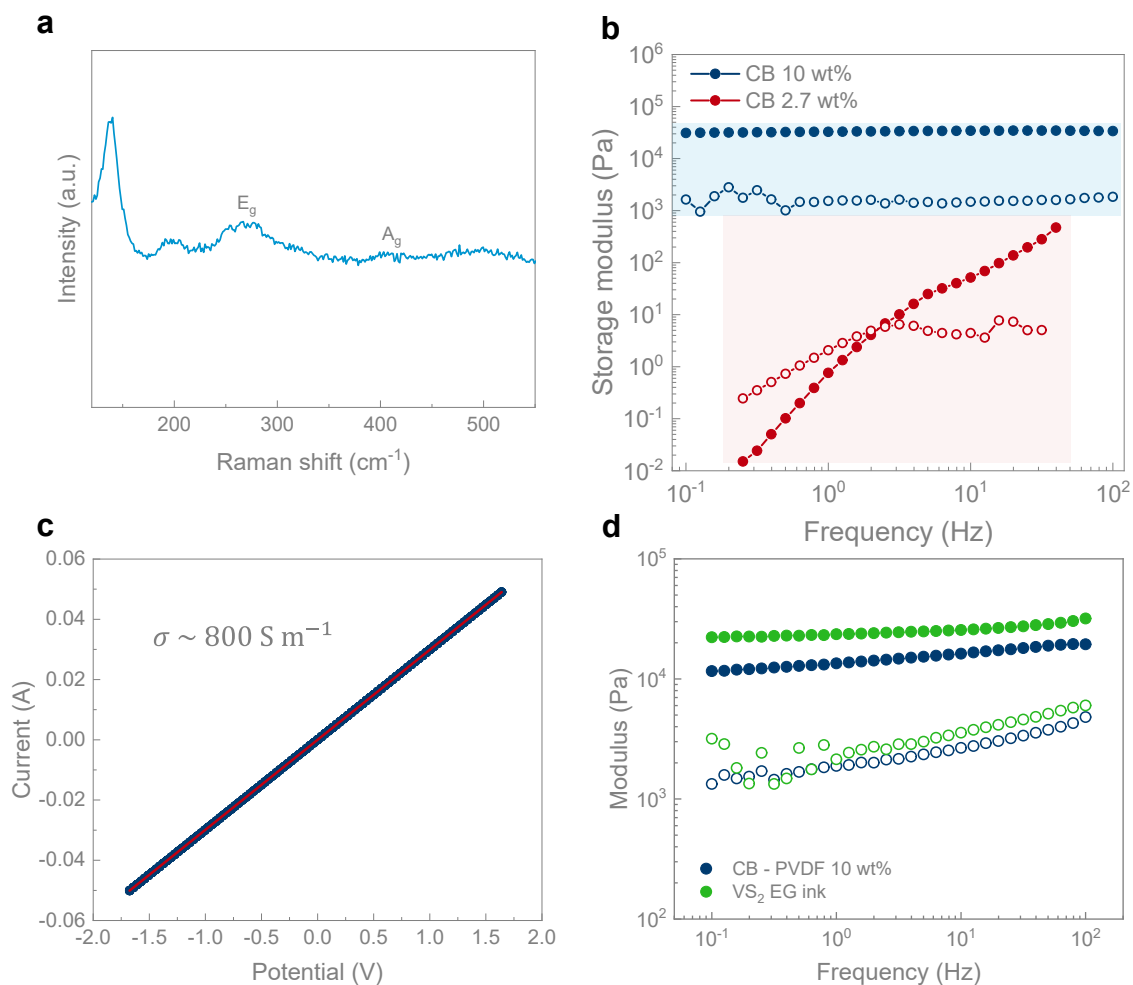

**Figure S1:** a) Raman spectrum of hydrothermal  $\text{VS}_2$ ; b) oscillatory rheology (frequency sweep) of carbon black dispersions in DMSO at different concentrations; c) I-V curve for the carbon black – PVDF conductive paste, presenting a conductivity of  $800 \text{ S m}^{-1}$ ; d) oscillatory rheology (frequency sweep) of the carbon black – PVDF ink and the  $\text{VS}_2$  ink showing a gel-like behaviour.

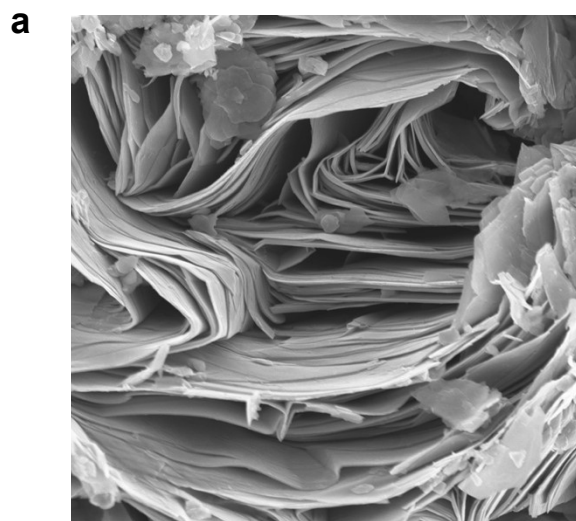

— 1 μm

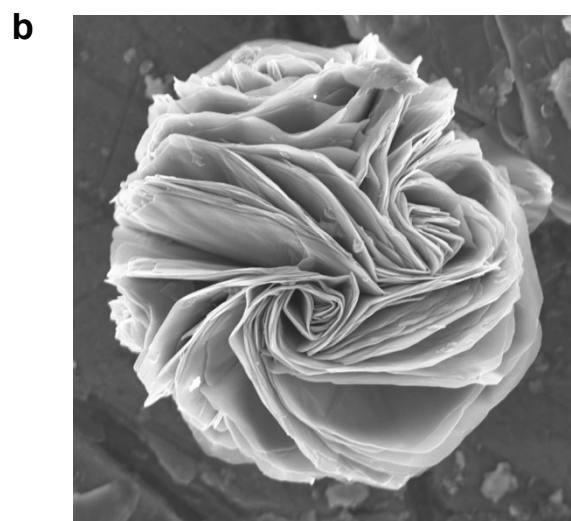

— 1 μm

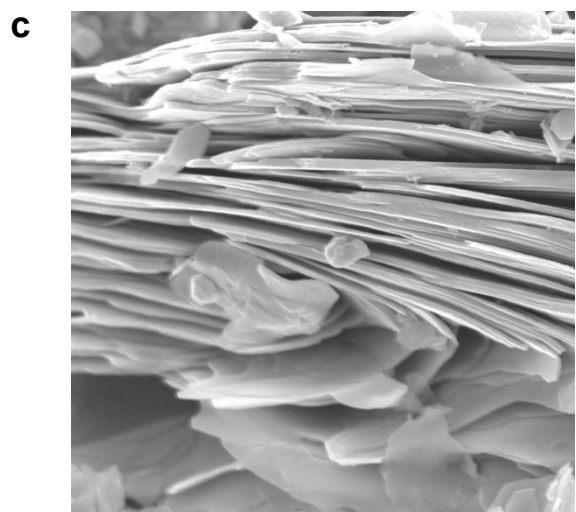

— 500 nm

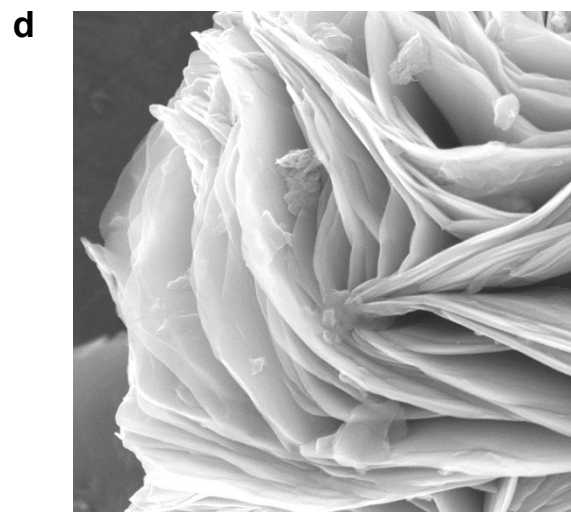

— 500 nm

**Figure S2:** SEM images of hydrothermal  $\text{VS}_2$  synthesized a,c) in water with no ethylene glycol, c,d) in water with ethylene glycol

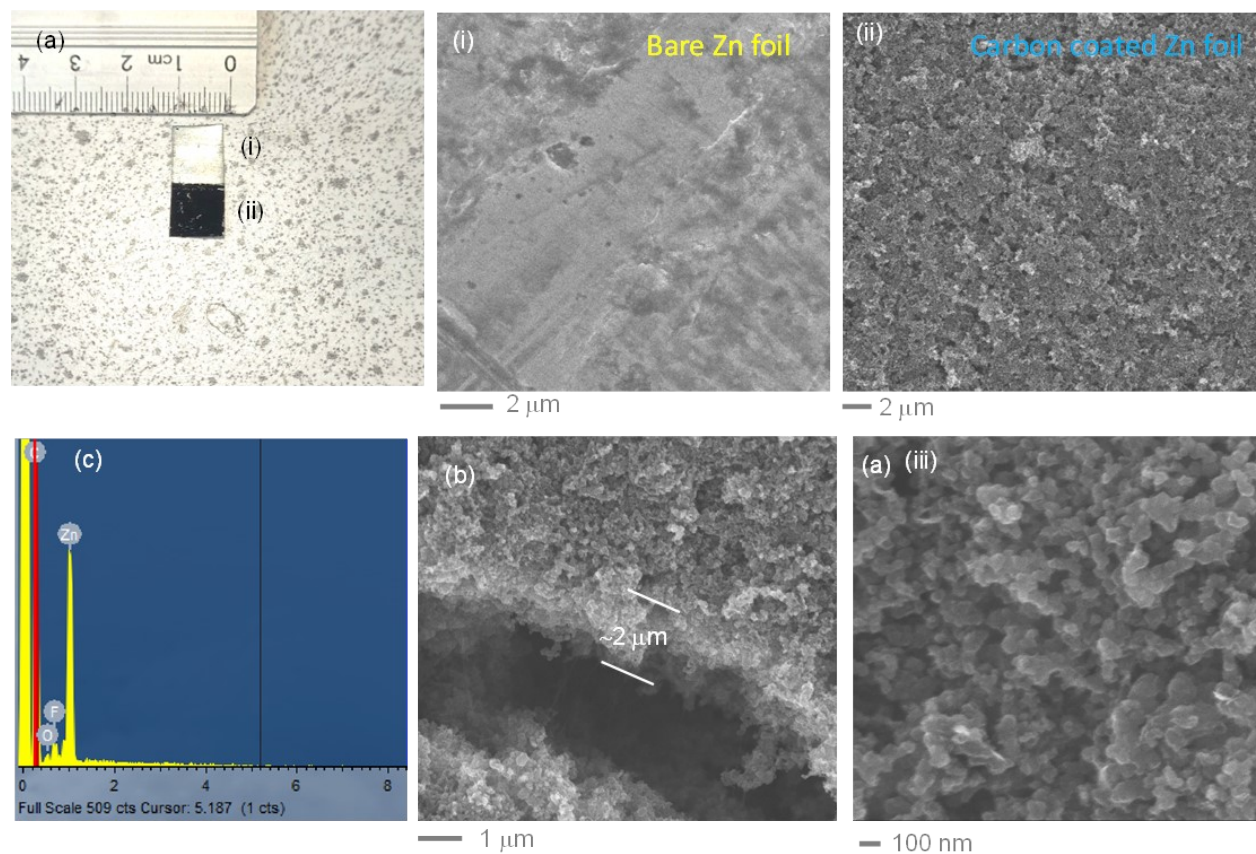

**Figure S3:** a) photographic image and a(i-iii) Low- and high-magnification SEM images of printed C@Zn foil anode using doctor blade method. SEM images demonstrate that the noncarbon is randomly distributed on the Zn foil with a thickness of  $\sim 2 \mu\text{m}$  (b), while the bare Zn foil (i) showing smooth surface. b) Thickness of the printed carbon on Zn foil. The elemental distribution of C@Zn foil was measured using EDX spectrum (c), which shows the characteristic peaks of C, Zn and F elements related to the carbon black, PVdF binder and Zn metal foil.

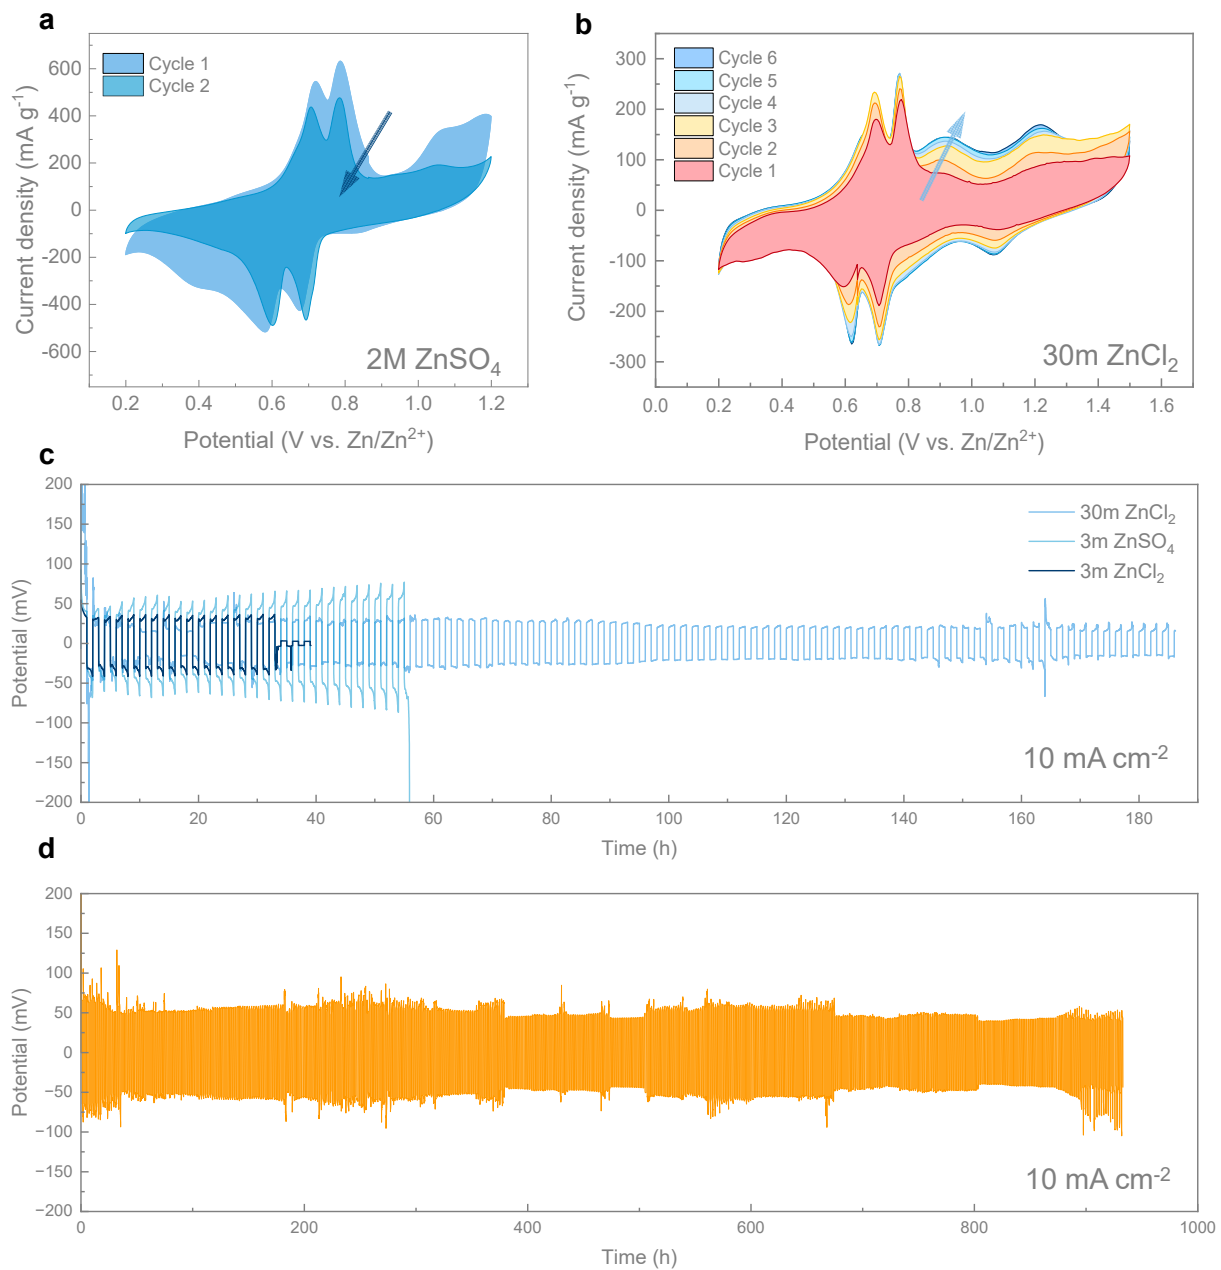

**Figure S4:** Comparison of the cyclic voltammograms of hydrothermal  $\text{VS}_2$  in a) 2M  $\text{ZnSO}_4$  and b) 30 m  $\text{ZnCl}_2$ ; c) galvanostatic plating/stripping tests ( $10 \text{ mA cm}^{-2}$ ) conducted on symmetric zinc foil cells in different electrolytes; d) galvanostatic plating/stripping tests ( $10 \text{ mA cm}^{-2}$ ) conducted on symmetric zinc foil coated with carbon black in 30m  $\text{ZnCl}_2$ .

|               |      |               |      |
|---------------|------|---------------|------|
| <b>Peak 1</b> | 0.47 | <b>Peak 4</b> | 0.48 |
| <b>Peak 2</b> | 0.43 | <b>Peak 5</b> | 0.49 |
| <b>Peak 3</b> | 0.73 | <b>Peak 6</b> | 0.74 |

**Table S1:**  
Results

of the kinetic analysis on the VS<sub>2</sub> electrodes

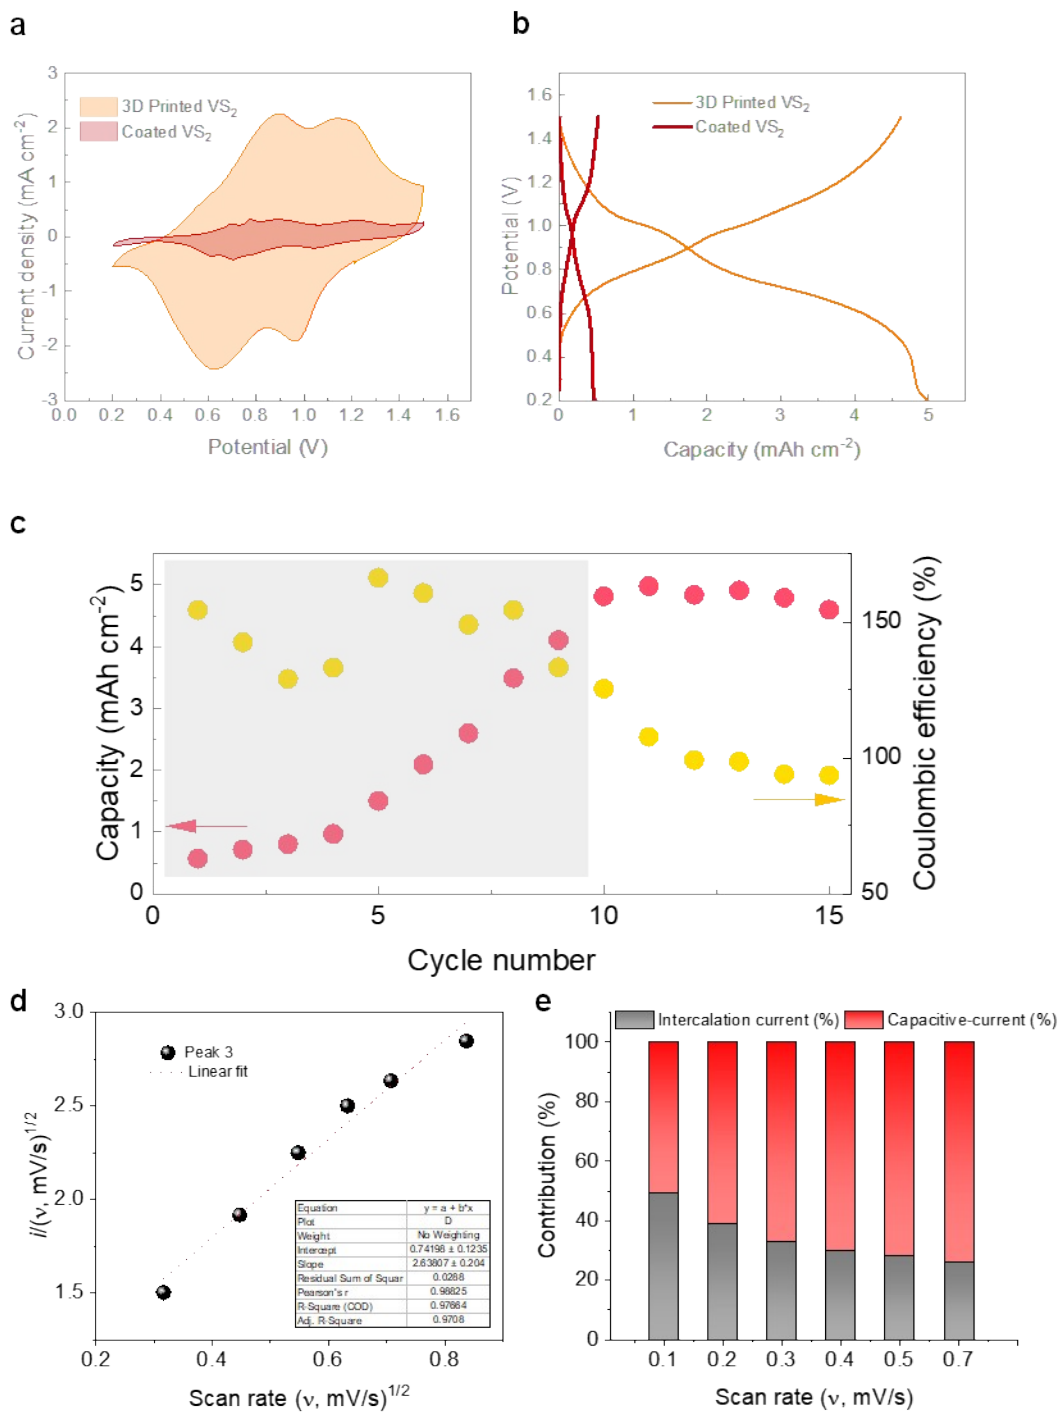

**Figure S5:** a) Cyclic voltammetry of the 3D printed VS<sub>2</sub> cathode and slurry-coated VS<sub>2</sub> cathode; b) galvanostatic charge-discharge of the 3D printed VS<sub>2</sub> cathode and slurry-coated VS<sub>2</sub> cathode (0.2 mA cm<sup>-2</sup>); c) capacity retention and coulombic efficiency of the 3D printed VS<sub>2</sub> cathode (0.2 mA cm<sup>-2</sup>). (d)

relationship of squar root of scan rate ( $v, \text{mv s}^{-1}$ )<sup>1/2</sup> vs.  $i/(v, \text{mv s}^{-1})^{1/2}$  and e) capacitive- and diffusion-controlled current contribution of the VS<sub>2</sub>-based ZIB.

The capacitive-type and diffusion-type current contribution of VS<sub>2</sub>-based ZIBs were quantified using the modified Power-law, as shown below. This evidences that the peak current ( $i_p$ ) is related to the combination of capacitive-controlled ( $S_1v$ ) and diffusion-controlled ( $S_2v$ ) processes.<sup>1, 2</sup>

$$i_p = S_1v + S_2v^{1/2} \quad (1)$$

$$i_p/v^{1/2} = S_1v^{1/2} + S_2v \quad (2)$$

Here,  $i_p$ ,  $v$ ,  $S_1$ , and  $S_2$  indicate the peak current, scan rate, and constants, respectively. By plotting the linear fit of  $i/v^{1/2}$  vs.  $v^{1/2}$ , as shown in the Figure S5d, the slope and intercept values of  $S_1$  and  $S_2$  can be obtained. Thus, the portion of capacitive- and diffusion-controlled contributions during the redox process were calculated using Eq. (2) and plotted in Figure S5(e). At a low-scan rate of 0.1 mV s<sup>-1</sup>, the VS<sub>2</sub> showed intercalation current contribution of 49.4% with a capacitive- contribution of 50.6%). While at the higher scan rate (0.7 mV s<sup>-1</sup>), capacitive-type current contribution was enhanced to 73.9% owing to the surface oxidation of VS<sub>2</sub>. These results collectively verify the mixed charge storage behaviour of the VS<sub>2</sub> with ZnCl<sub>2</sub> electrolyte.



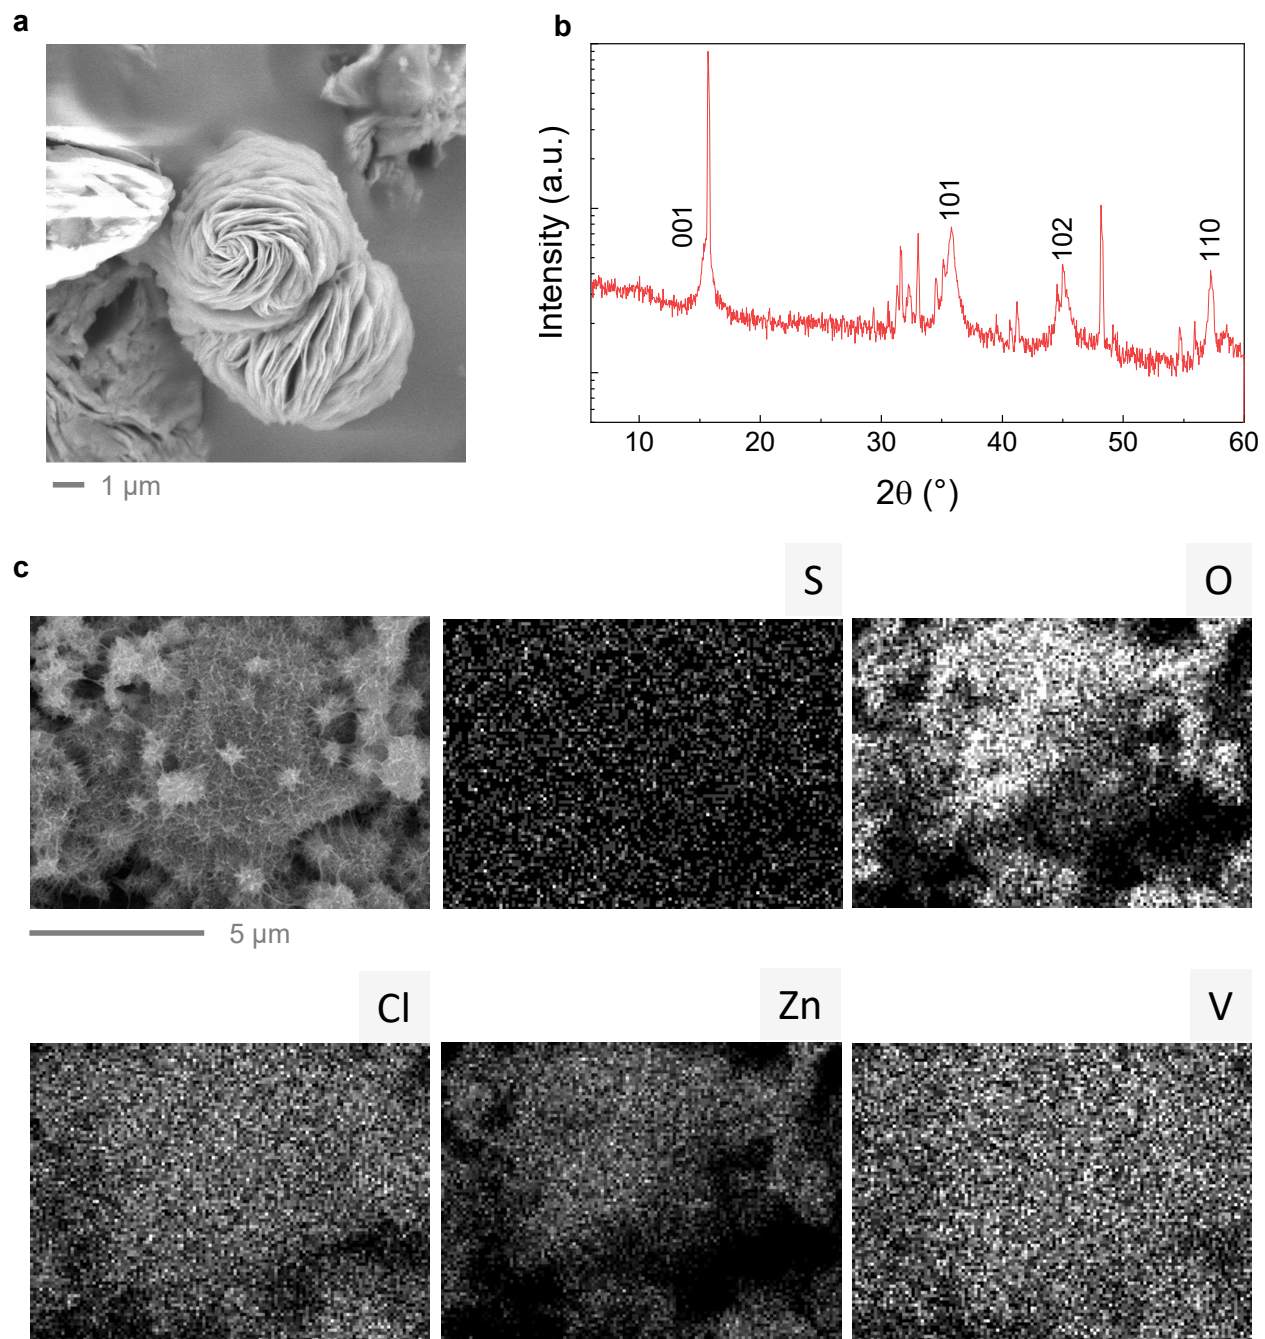

**Figure S6:** a) SEM imaging of the VS<sub>2</sub> nanoflowers after soaking in WISE for 14 days; b) XRD on the VS<sub>2</sub> nanoflowers soaked in WISE for 14 days, with the reflections originating from VS<sub>2</sub> (labelled peaks); the other peaks likely arise from unwashed WISE and corresponding by-products (*e.g.* zinc hydroxychlorides); c) EDS mapping of the VS<sub>2</sub> nanoflowers after soaking in WISE for 14 days.



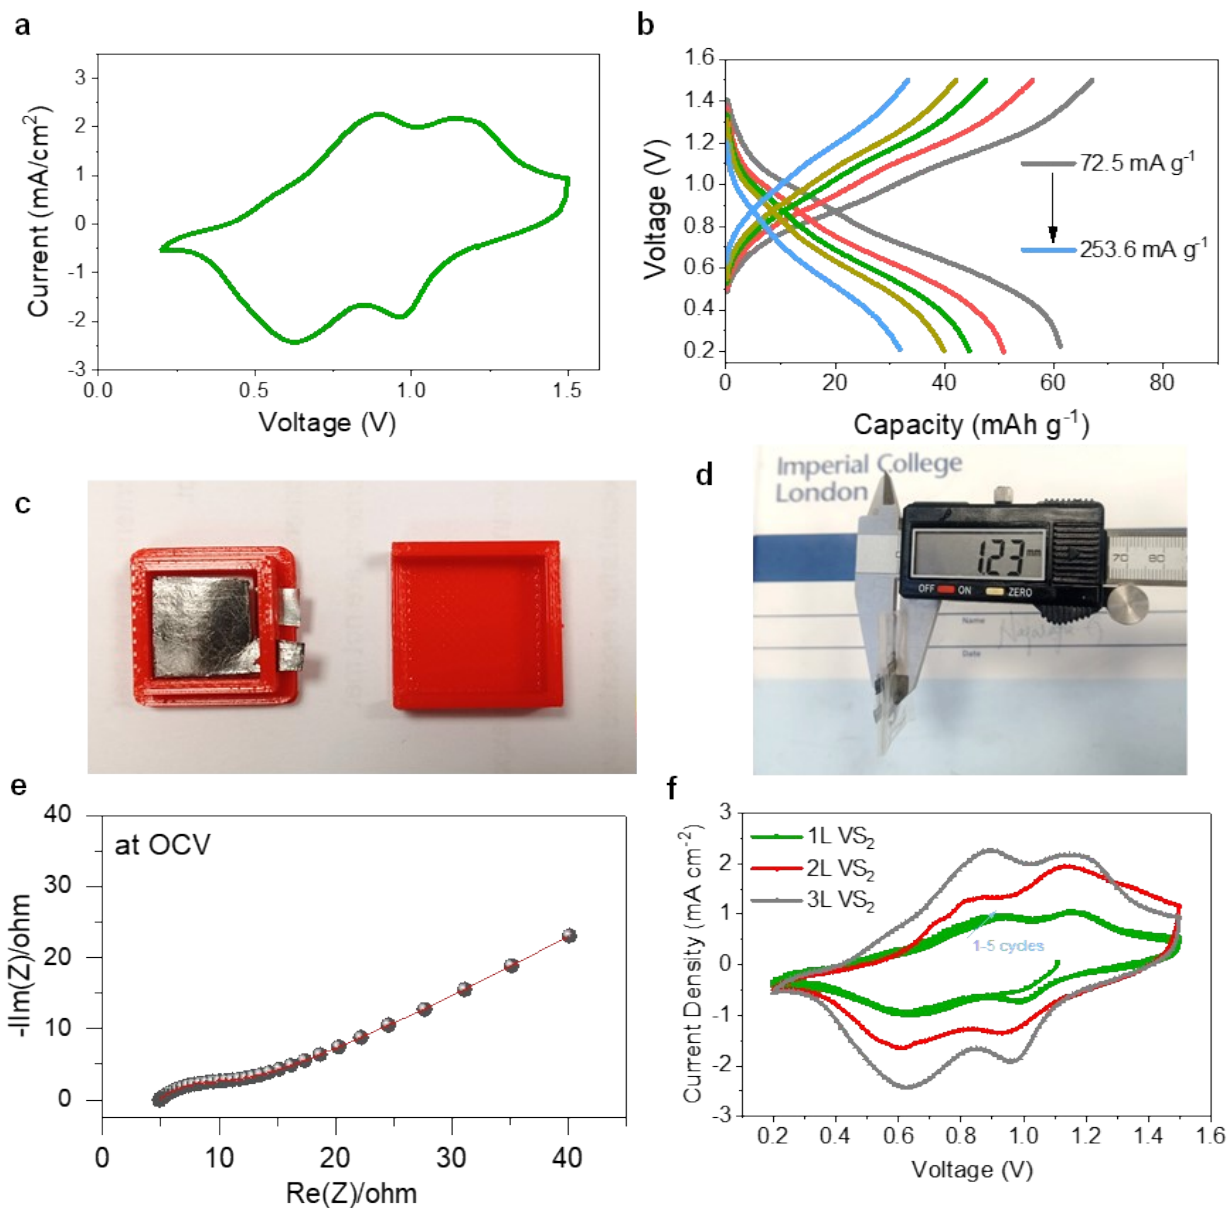

**Figure S7:** a) Cyclic voltammety of the 3D printed 3L VS<sub>2</sub>/C@Zn cell components, after soaking in WISE for 14 days (0.2 mV s<sup>-1</sup>); b) gravimetric charge-discharge curves of the ZIB with a 3D printed 3L VS<sub>2</sub> cathode; c) digital photographs showing the encapsulation of the substrate with the printed electrode inside a 3D printed polylactic acid case and d) thickness of the pouch-type ZIB using 3L VS<sub>2</sub> and C@Zn electrodes with 30m ZnCl<sub>2</sub> electrolyte. e) Nyquist plot of 3L VS<sub>2</sub>/C@Zn cell at open circuit voltage (OCV) and f) cyclic voltammety curves showing the effect of 3D printing layers (1-3 layers of VS<sub>2</sub>) on redox performance of ZIBs.

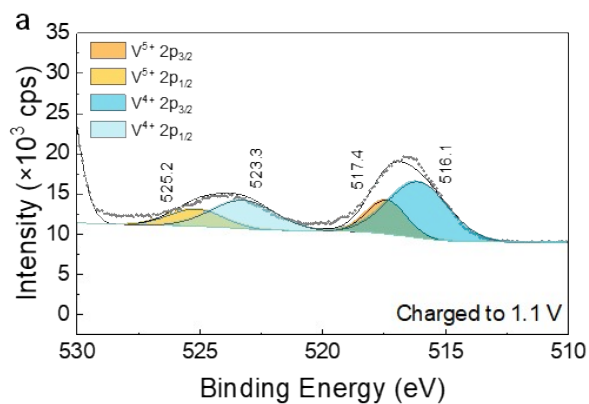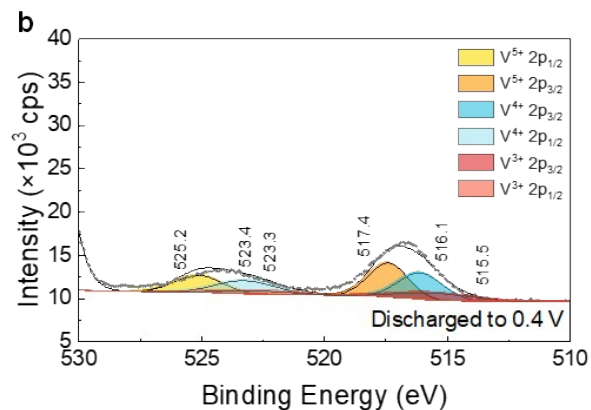

**c**

|          | Peak BE | Atomic % |
|----------|---------|----------|
| $V^{5+}$ | 517.4   | 28.8     |
| $V^{4+}$ | 516.1   | 71.2     |

**d**

|          | Peak BE | Atomic % |
|----------|---------|----------|
| $V^{5+}$ | 517.4   | 42.8     |
| $V^{4+}$ | 516.1   | 37.9     |
| $V^{3+}$ | 515.5   | 19.3     |

**Figure S8:** high-resolution XPS spectra of the V 2p core-level electrons during charge (a) and discharge (b), and corresponding atomic compositions (c, d).

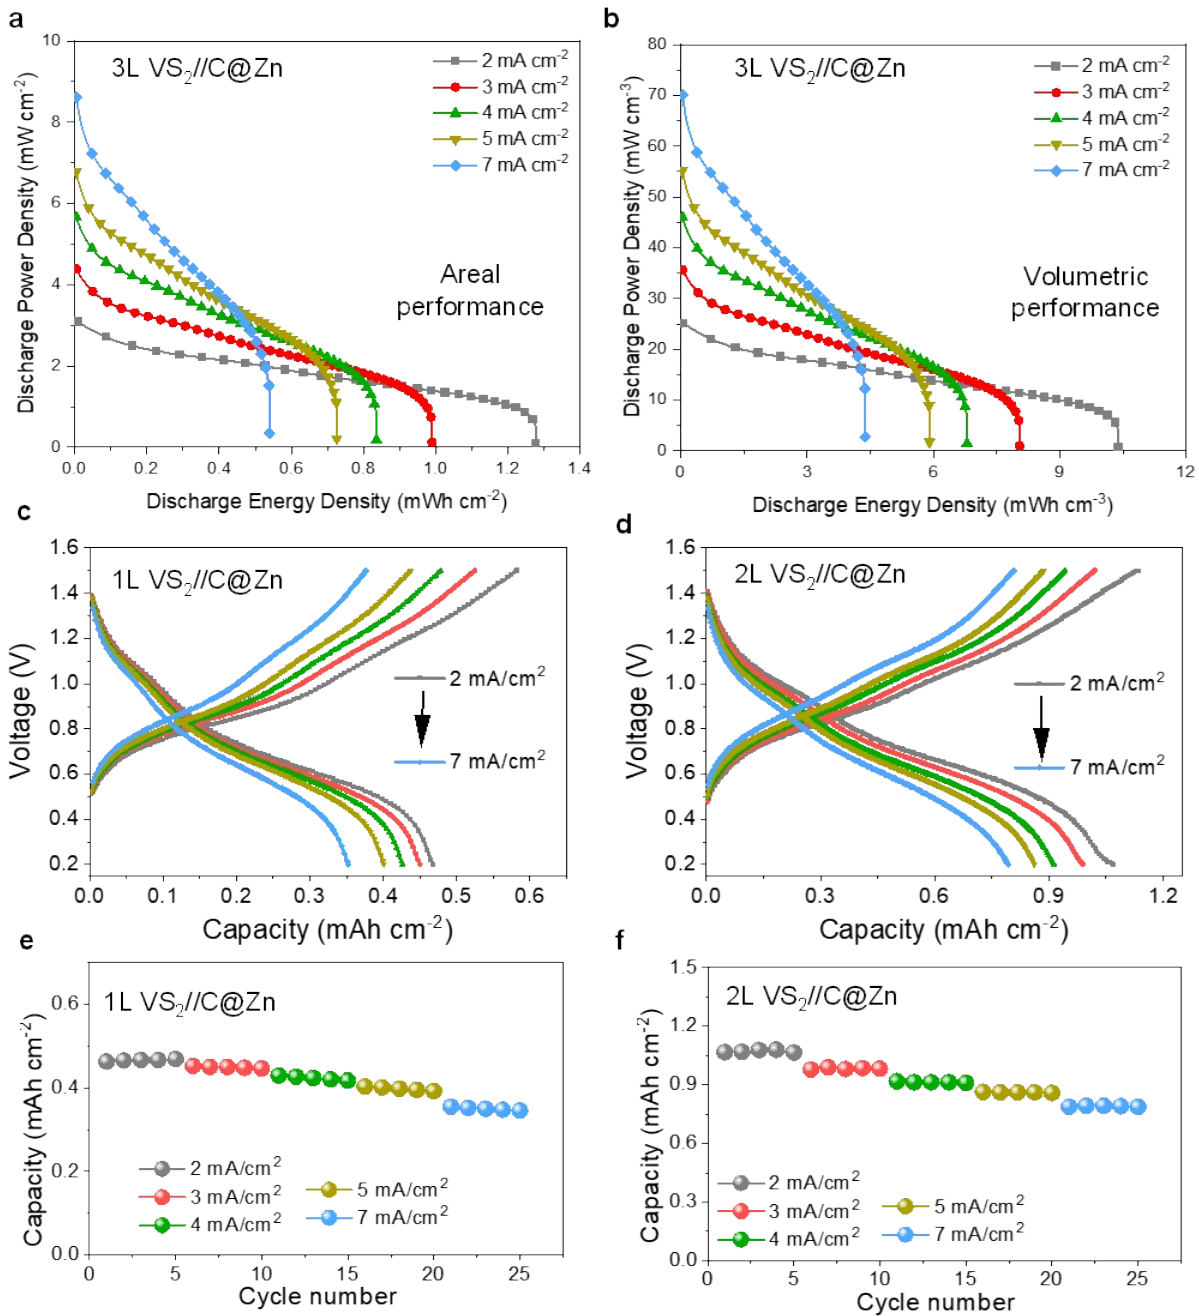

**Figure S9.** Discharge energy density vs. power density of fabricated of 3L VS<sub>2</sub>//C@Zn cell measured under various current densities of 2-7 mA cm<sup>-2</sup>. a) Areal performance and b) volumetric performance. c)-f) charge-discharge capacity profiles and rate capability vs. cycle number of 1L VS<sub>2</sub>//C@Zn and 2L VS<sub>2</sub>//C@Zn cells.

## SI References:

1. Junlin Lu, Hao Ran, Jien Li, Jing Wan, Congcong Wang, Peiyuan Ji, Xue Wang, Guanlin Liu, Chenguo Hu. A fast composite-hydroxide-mediated approach for synthesis of 2D-LiCoO<sub>2</sub> for high performance asymmetric supercapacitor. *Electrochimica Acta*, 331, 135426, (2020).
2. Yuhang Dai, Chengyi Zhang, Jianwei Li, Xuan Gao, Ping Hu, Chumei Ye, Hongzhen He, Jiexin Zhu, Wei Zhang, Ruwei Chen, Wei Zong, Fei Guo, Ivan P. Parkin, Dan J. L. Brett, Paul R. Shearing, Liqiang Mai, Guanjie He. Inhibition of Vanadium Cathodes Dissolution in Aqueous Zn-Ion Batteries. *Adv. Mater.* 2310645 (2024).
